# Supplementary material for: Crystal structures and magnetic properties of a set of dihalo-bridged oxalamidato copper(ii) dimers
Source: Royal Society of Chemistry journal article supplement (doi:10.1039/c4dt00925h), 2014-06-05
Supplement: c4dt00925h1.pdf [file c4dt00925h1.pdf]

## Supporting Information

for

### Crystal Structures and Magnetic Properties of a Set of Dihalo-Bridged Oxalamidato Copper(II) Dimers

Dijana Žilić,<sup>a</sup> Boris Rakvin,<sup>a</sup> Dalibor Milić,<sup>b‡</sup> Damir Pajić,<sup>c</sup> Ivica Đilović,<sup>b</sup> Massimo Cametti<sup>d</sup> and Zoran Džolić\*<sup>a</sup>

<sup>a</sup> Ruđer Bosković Institute, Bijenička cesta 54, 10000 Zagreb, Croatia; E-mail: [Zoran.Dzolic@irb.hr](mailto:Zoran.Dzolic@irb.hr)

<sup>b</sup> Department of Chemistry, Faculty of Science, University of Zagreb, Horvatovac 102A, 10000 Zagreb, Croatia

<sup>c</sup> Department of Physics, Faculty of Science, University of Zagreb, Bijenička cesta 32, 10000 Zagreb, Croatia

<sup>d</sup> Department of Chemistry, Materials and Chemical Engineering "Giulio Natta", Politecnico di Milano, Via L. Mancinelli 7, 20131 Milano, Italy

<sup>‡</sup> Present address: Paul Scherrer Institut, 5232 Villigen PSI, Switzerland

#### Table of content

|                                                                                                                         |         |
|-------------------------------------------------------------------------------------------------------------------------|---------|
| Fig. S1: FT-IR spectra of the ligand L <sup>1</sup> and complexes L <sup>1</sup> -Cl and L <sup>1</sup> -Br.....        | page 2  |
| Fig. S2: FT-IR spectra of the ligand L <sup>2</sup> and complexes L <sup>2</sup> -Cl and L <sup>2</sup> -Br .....       | page 2  |
| Fig. S3: Comparison between measured and calculated powder diffraction patterns for L <sup>1</sup> -Cl.....             | page 3  |
| Fig. S4: Comparison between measured and calculated powder diffraction patterns for L <sup>2</sup> -Cl.....             | page 3  |
| Fig. S5: Comparison between measured and calculated powder diffraction patterns for L <sup>1</sup> -Br.....             | page 4  |
| Fig. S6: Comparison between measured and calculated powder diffraction patterns for L <sup>2</sup> -Br.....             | page 4  |
| Description of the Crystal Packing Interactions for L <sup>2</sup> -Cl, L <sup>1</sup> -Br and L <sup>2</sup> -Br.....  | page 5  |
| Table 5: Relevant hydrogen-bonding parameters.....                                                                      | page 6  |
| Table 6: Relevant stacking interactions.....                                                                            | page 6  |
| Table 7: Relevant C-H...π interactions.....                                                                             | page 7  |
| Fig. S7: Atom numbering schemes for L <sup>1</sup> -Cl and L <sup>2</sup> -Cl.....                                      | page 8  |
| Fig. S8: Atom numbering schemes for L <sup>1</sup> -Br and L <sup>2</sup> -Br .....                                     | page 9  |
| Fig. S9: Molecular packing in the crystal structure of L <sup>2</sup> -Cl.....                                          | page 10 |
| Fig. S10: Molecular packing in the crystal structure of L <sup>1</sup> -Br.....                                         | page 11 |
| Fig. S11: Molecular packing in the crystal structure of L <sup>2</sup> -Br.....                                         | page 12 |
| Fig. S12: Angular variation of the g-values and the W <sub>pp</sub> linewidths of EPR lines for L <sup>2</sup> -Cl..... | page 13 |
| Fig. S13: Angular variation of the g-values and the W <sub>pp</sub> linewidths of EPR lines for L <sup>1</sup> -Br..... | page 14 |
| Fig. S14: Angular variation of the g-values and the W <sub>pp</sub> linewidths of EPR lines for L <sup>2</sup> -Br..... | page 15 |
| Fig. S15: Temperature dependence of magnetization and Curie-Weiss fitting curves.....                                   | page 16 |
| Table 8: Structural and magnetic properties for the selected dibromo-bridged copper(II) dimers.....                     | page 17 |

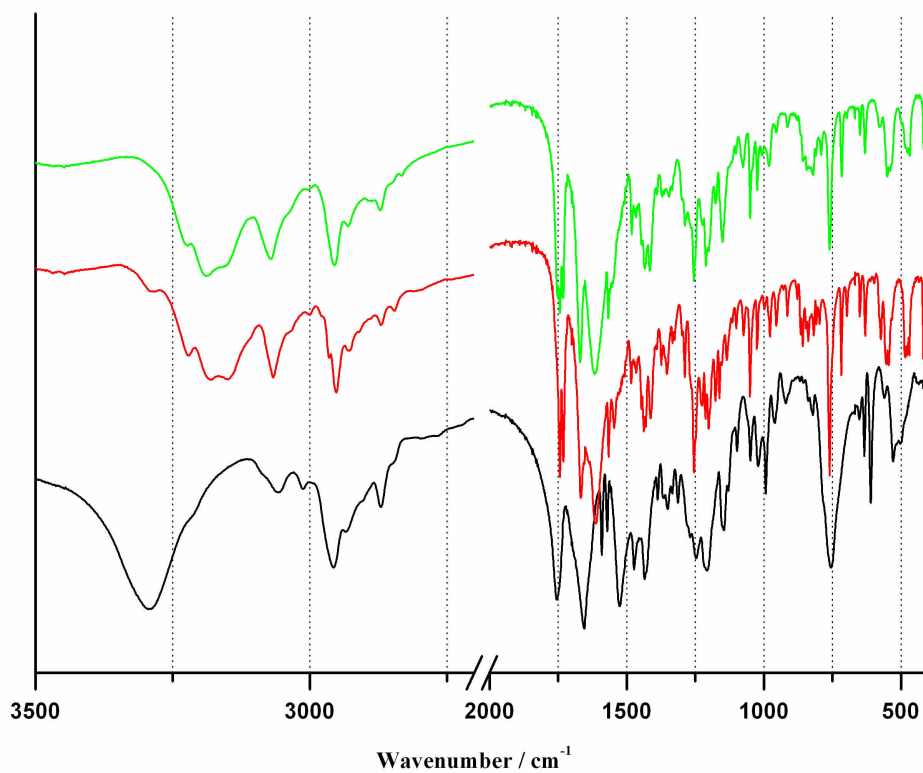

**Fig. S1:** FT-IR spectra of the ligand L<sup>1</sup> (black line) and complexes L<sup>1</sup>-Cl (green line) and L<sup>1</sup>-Br (red line).

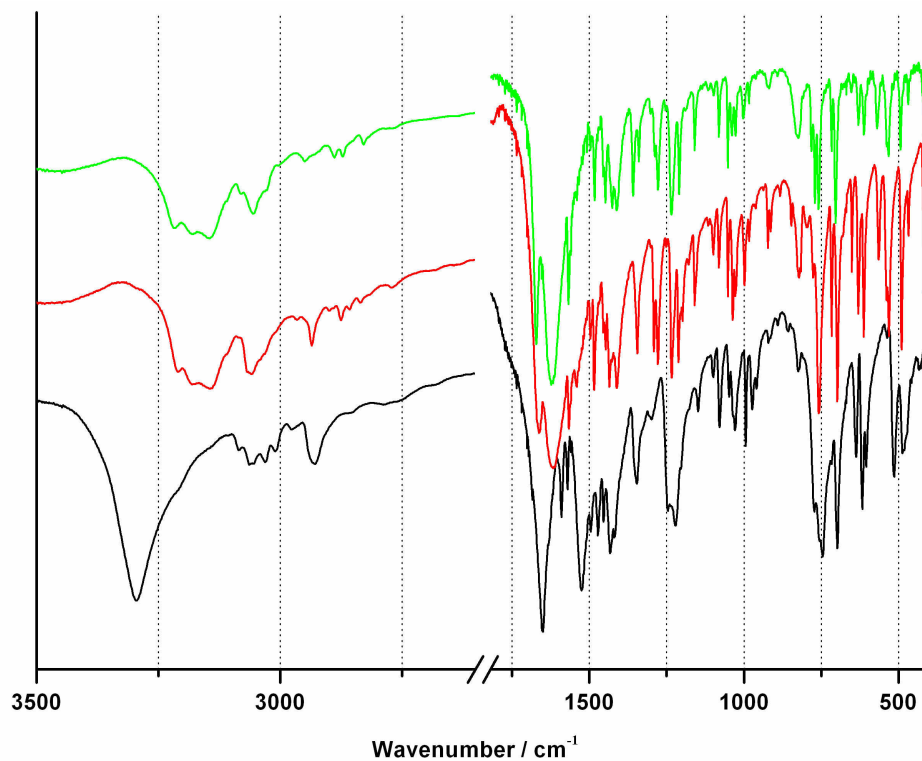

**Fig. S2:** FT-IR spectra of the ligand L<sup>2</sup> (black line) and complexes L<sup>2</sup>-Cl (green line) and L<sup>2</sup>-Br (red line).

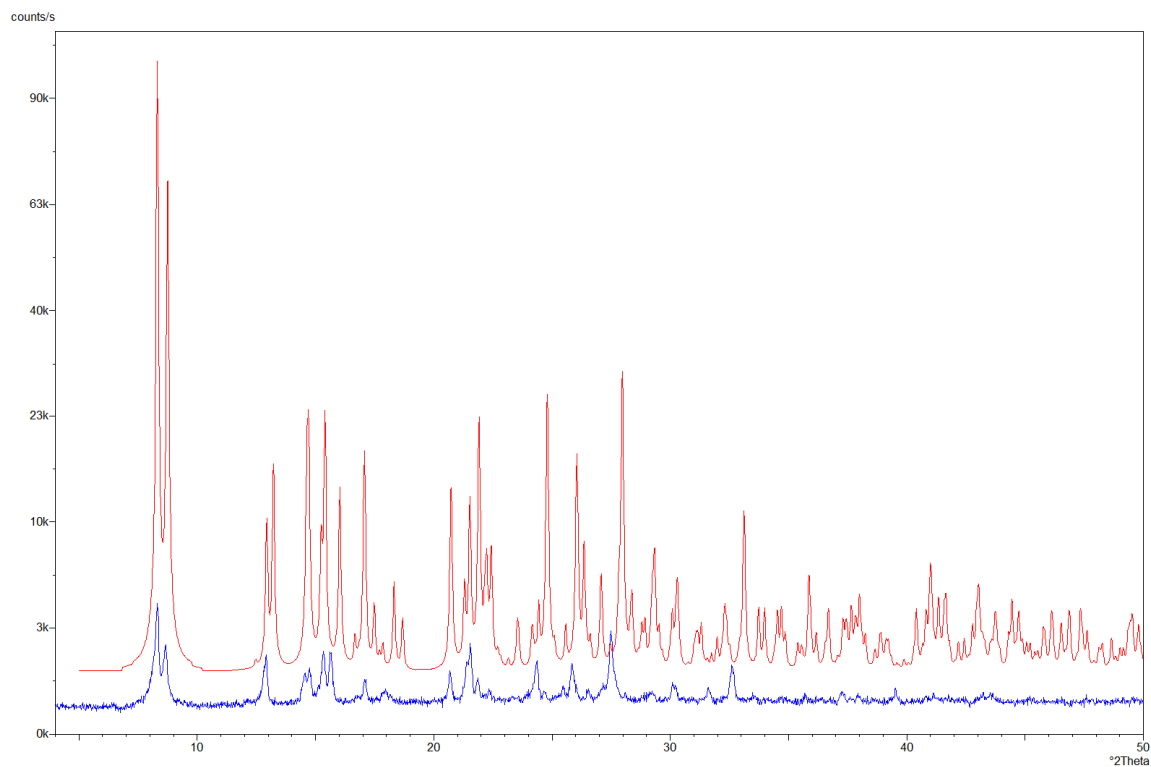

**Fig. S3:** Comparison between the measured (blue) and the calculated (red) powder diffraction patterns for  $L^1\text{-Cl}$ .

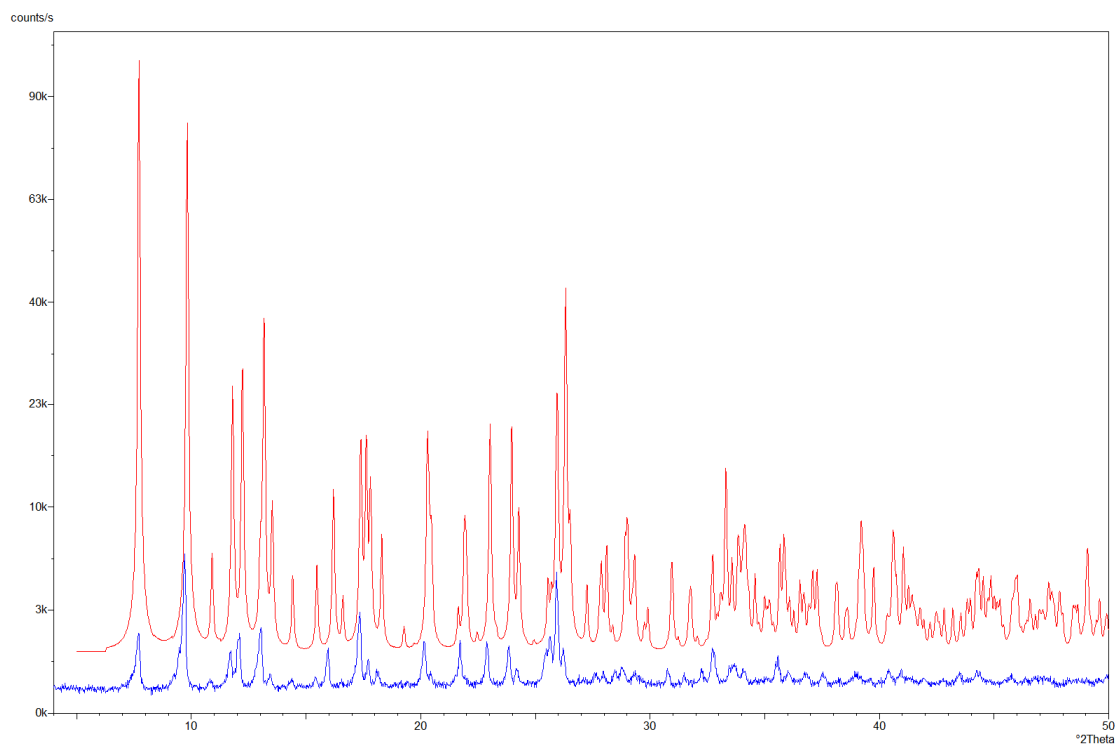

**Fig. S4:** Comparison between the measured (blue) and the calculated (red) powder diffraction patterns for  $L^2\text{-Cl}$ .

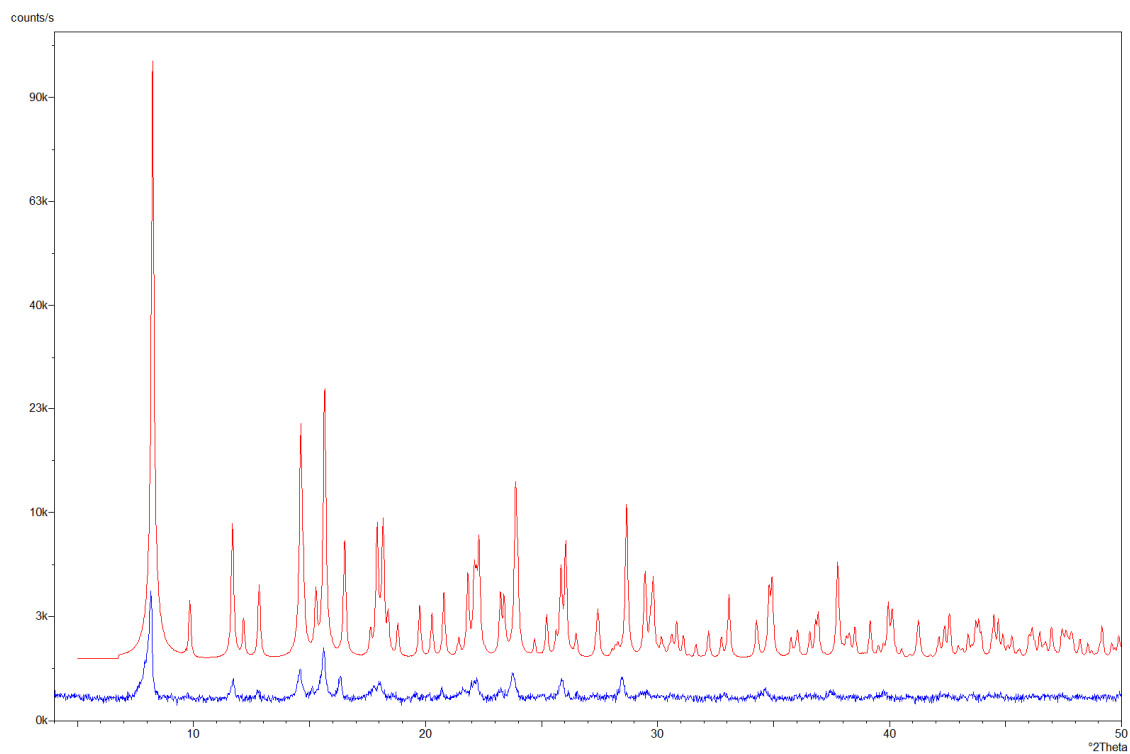

**Fig. S5:** Comparison between the measured (blue) and the calculated (red) powder diffraction patterns for L<sup>1</sup>-Br.

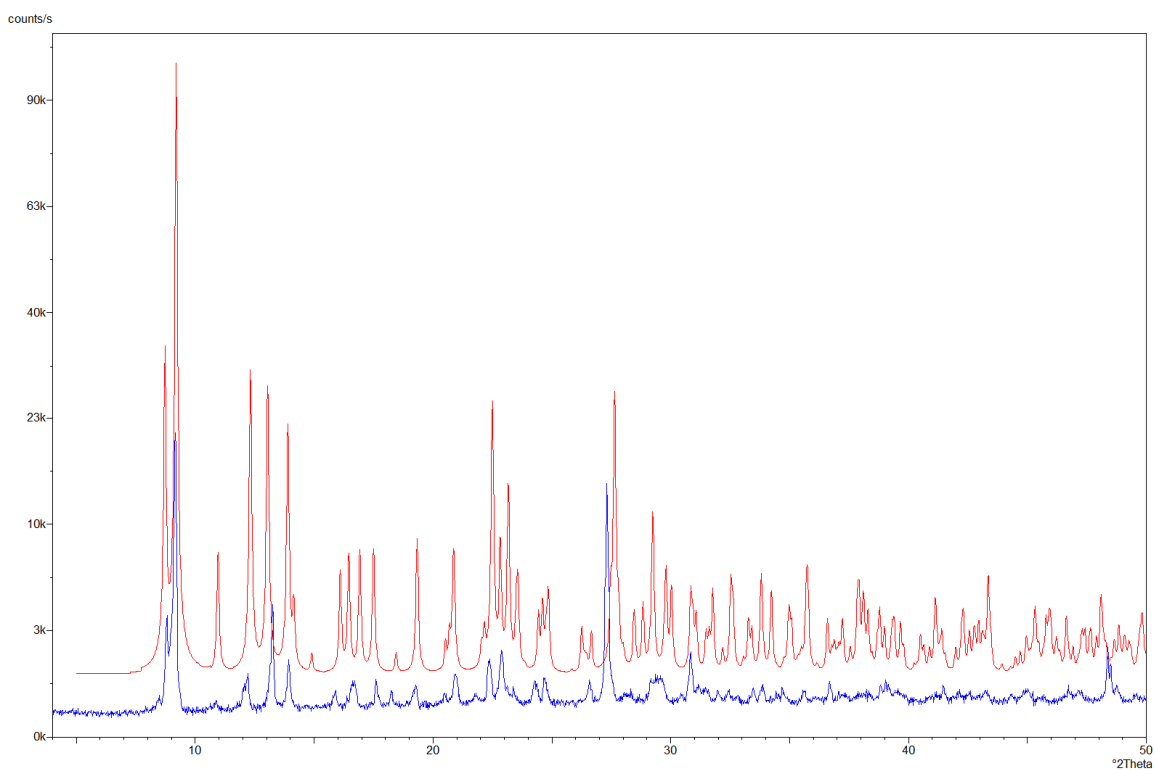

**Fig. S6:** Comparison between the measured (blue) and the calculated (red) powder diffraction patterns for L<sup>2</sup>-Br.

## Description of the Crystal Packing Interactions for $L^2\text{-Cl}$ , $L^1\text{-Br}$ and $L^2\text{-Br}$ .

The crystal structure of  $L^1\text{-Cl}$  has been described in a previous occasion [Z. Džolić et al., *Chem.-Eur. J.*, 2013, **19**, 5411–5416]. Here, we provide a description of the crystal packing interactions observed in the three other complexes ( $L^2\text{-Cl}$ ,  $L^1\text{-Br}$  and  $L^2\text{-Br}$ ). Complete atom numbering schemes are presented in Figures S7 and S8. Geometrical details of the hydrogen bonding, stacking and C–H $\cdots\pi$  interactions are given in Tables 5, 6 and 7, respectively.

A common structural motif present in all cases is constituted by an infinite chain of molecular dimers connected by N–H $\cdots$ O hydrogen bonds between the oxalamide groups (Figure 4 in the article). Other supramolecular structural features, instead, differ among the four crystal structures. In the structure of  $L^2\text{-Cl}$ , *N*-benzyl group are found having two different conformations, with the minor one (yellow in Figure S9) occurring in 16 % of monomers. The intramolecular C15A–H15A $\cdots$ O2 bonds form only when the *N*-benzyl group assumes the major conformation (gray in Figure S9). The dinuclear complexes are also linked by C–H $\cdots\pi$  interactions between the methylene groups and the metalloaromatic chelate rings as well as those between the pyridyl and the disordered *N*-benzyl units, regardless of which of the two possible conformation is adopted (Figure S9c). In addition to the characteristic N–H $\cdots$ O hydrogen bonds in  $L^2\text{-Cl}$ , there are also weak intermolecular C4–H4 $\cdots$ C11 ( $-1-x, 2-y, 1-z$ ) interactions (Figure S9b).

Stacking interactions between pyridine and metalloaromatic chelate rings play an important role in crystal packing of  $L^1\text{-Cl}$  as well as of both  $L^1\text{-Br}$  and  $L^2\text{-Br}$  dimers (Figures S10 and S11). Furthermore, these stacking interactions are accompanied with the C–H $\cdots$ O bonds between pyridyl moieties and the ester carbonyl O atoms of the two  $L^1\text{-Br}$  molecules stacked together (Figure 11b) or, in case of  $L^2\text{-Br}$ , C–H $\cdots\pi$  interactions involving a pyridyl *para* C–H and an *N*-benzyl aromatic ring (Figure S11b). In the structure of  $L^1\text{-Br}$ , a weak C–H $\cdots\pi$  interaction there also exists, but between methyl C28–H28C and the metalloaromatic chelate ring of the adjacent dimer (Figure S10). Moreover,  $L^1\text{-Br}$  and  $L^2\text{-Br}$  also possess other weak intermolecular C–H $\cdots$ A interactions, as detailed in Table 5 and illustrated in Figures S10 and S11. Surprisingly,  $\pi$ – $\pi$  stacking interactions between aryl groups are only present in the structure of  $L^2\text{-Br}$  (Figure S11b).

**Table 5** Hydrogen-bonding parameters (Å, °) in crystal structures of the studied complexes.

|                         | <i>D</i> – <i>H</i> ... <i>A</i> | <i>D</i> – <i>H</i> | <i>H</i> ... <i>A</i> | <i>D</i> ... <i>A</i> | <i>D</i> – <i>H</i> ... <i>A</i> | Symmetry operator on <i>A</i>                |
|-------------------------|----------------------------------|---------------------|-----------------------|-----------------------|----------------------------------|----------------------------------------------|
| <b>L<sup>1</sup>–Cl</b> | N3–H3N...O5                      | 0.86(2)             | 2.08(3)               | 2.858(3)              | 150(2)                           | 1 + <i>x</i> , 1 + <i>y</i> , <i>z</i>       |
|                         | N6–H6N...O1                      | 0.85(2)             | 1.99(3)               | 2.816(3)              | 163(2)                           | – 1 + <i>x</i> , – 1 + <i>y</i> , <i>z</i>   |
|                         | O9–H9A...Cl2                     | 0.84                | 2.46                  | 3.256(5)              | 158                              | .                                            |
|                         | C2–H2...O9                       | 0.95                | 2.42                  | 3.240(7)              | 144                              | 1 + <i>x</i> , <i>y</i> , <i>z</i>           |
|                         | C19–H19...O3                     | 0.95                | 2.46                  | 3.126(4)              | 127                              | – 1 + <i>x</i> , <i>y</i> , <i>z</i>         |
|                         | C20–H20...Cl2                    | 0.95                | 2.79                  | 3.366(2)              | 120                              | .                                            |
|                         | C25–H25A...O1                    | 0.99                | 2.54                  | 3.257(3)              | 129                              | – 1 + <i>x</i> , – 1 + <i>y</i> , <i>z</i>   |
| <b>L<sup>2</sup>–Cl</b> | N3–H3N...O1                      | 0.86(2)             | 1.96(2)               | 2.721(3)              | 147(2)                           | 1 – <i>x</i> , 1 – <i>y</i> , 1 – <i>z</i>   |
|                         | C15A–H15A...O2                   | 0.95                | 2.50                  | 3.183(5)              | 129                              | .                                            |
|                         | C4–H4...Cl1                      | 0.95                | 2.75                  | 3.659(3)              | 162                              | – 1 – <i>x</i> , 2 – <i>y</i> , 1 – <i>z</i> |
| <b>L<sup>1</sup>–Br</b> | N3–H3N...O5                      | 0.88                | 1.96                  | 2.796(5)              | 159                              | 1 + <i>x</i> , <i>y</i> , – 1 + <i>z</i>     |
|                         | N6–H6N...O1                      | 0.88                | 1.98                  | 2.758(5)              | 146                              | – 1 + <i>x</i> , <i>y</i> , 1 + <i>z</i>     |
|                         | C3–H3...O7                       | 0.95                | 2.35                  | 3.241(6)              | 157                              | 1 + <i>x</i> , <i>y</i> , <i>z</i>           |
|                         | C10–H10B...O5                    | 0.99                | 2.46                  | 3.101(5)              | 122                              | 1 + <i>x</i> , <i>y</i> , – 1 + <i>z</i>     |
|                         | C18–H18...O3                     | 0.95                | 2.53                  | 3.424(6)              | 156                              | – 1 + <i>x</i> , <i>y</i> , <i>z</i>         |
|                         | C21–H21B...O7                    | 0.99                | 2.46                  | 3.404(5)              | 159                              | <i>x</i> , – 1 + <i>y</i> , <i>z</i>         |
| <b>L<sup>2</sup>–Br</b> | N3–H3N...O1                      | 0.88                | 2.09                  | 2.802(6)              | 138                              | 2 – <i>x</i> , 1 – <i>y</i> , 1 – <i>z</i>   |
|                         | C6–H6A...Br1                     | 0.99                | 2.87                  | 3.750(5)              | 148                              | 2 – <i>x</i> , 1 – <i>y</i> , – <i>z</i>     |

**Table 6** Stacking interactions (Å, °) in the studied crystal structures.

|                         | Ring <i>m</i> ...Ring <i>n</i> <sup><i>a</i></sup> | <i>Cgm</i> ... <i>Cgn</i> <sup><i>b</i></sup> | <i>α</i> <sup><i>c</i></sup> | Mean plane of<br>Ring <i>m</i> ... <i>Cgn</i> | Ring<br>offset  | Symmetry<br>operator on ring <i>n</i>    |
|-------------------------|----------------------------------------------------|-----------------------------------------------|------------------------------|-----------------------------------------------|-----------------|------------------------------------------|
| <b>L<sup>1</sup>–Cl</b> | Ring 1...Ring 4                                    | 3.644(1)                                      | 4.9(1)                       | 3.528(1)                                      |                 | 1 + <i>x</i> , <i>y</i> , <i>z</i>       |
|                         | Ring 2...Ring 3                                    | 3.647(1)                                      | 8.1(1)                       | 3.542(1)                                      |                 | <i>x</i> – 1, <i>y</i> , <i>z</i>        |
| <b>L<sup>1</sup>–Br</b> | Ring 1...Ring 4                                    | 3.675(2)                                      | 5.4(2)                       | 3.482(2)                                      |                 | 1 + <i>x</i> , <i>y</i> , <i>z</i>       |
|                         | Ring 2...Ring 3                                    | 3.652(2)                                      | 6.8(2)                       | 3.492(2)                                      |                 | <i>x</i> – 1, <i>y</i> , <i>z</i>        |
| <b>L<sup>2</sup>–Br</b> | Ring 1...Ring 3                                    | 3.601(3)                                      | 5.7(2)                       | 3.496(2)                                      |                 | 2 – <i>x</i> , 1 – <i>y</i> , – <i>z</i> |
|                         | Ring 5...Ring 5                                    | 3.708(4)                                      | 0                            | 3.566(3)                                      | <i>ca.</i> 1.02 | 1 – <i>x</i> , – <i>y</i> , 1 – <i>z</i> |

<sup>*a*</sup> Definition of the rings:

Ring 1 – metalloaromatic chelate ring Cu1/O2/C8/C7/N2;

Ring 2 – metalloaromatic chelate ring Cu2/O6/C23/C22/N5;

Ring 3 – pyridyl ring N1/C1–C5;

Ring 4 – pyridyl ring N4/C16–C20;

Ring 5 – phenyl ring C10–C15.

<sup>*b*</sup> *Cgm* and *Cgn* are centroids of the rings *m* and *n*.<sup>*c*</sup> *α* is the dihedral angle between the mean planes of the two interacting rings (*m* and *n*).

**Table 7** C–H... $\pi$  interactions ( $\text{\AA}$ ,  $^\circ$ ) in the studied structures.

|                         | <i>D</i> –H... <i>Cg</i> <sup>a</sup> | H... <i>Cg</i> | <i>D</i> ... <i>Cg</i> | <i>D</i> –H... <i>Cg</i> | Symmetry operator on <i>Cg</i> |
|-------------------------|---------------------------------------|----------------|------------------------|--------------------------|--------------------------------|
| <b>L<sup>2</sup>–Cl</b> | C2–H2... <i>Cg</i> 5A                 | 2.68           | 3.573(4)               | 156                      | $-x, 1-y, 1-z$                 |
|                         | C2–H2... <i>Cg</i> 5B                 | 2.82           | 3.527(7)               | 132                      | $-x, 1-y, 1-z$                 |
|                         | C6–H6B... <i>Cg</i> 1                 | 3.00           | 3.927(2)               | 157                      | $-x, 1-y, 1-z$                 |
| <b>L<sup>1</sup>–Br</b> | C28–H28C... <i>Cg</i> 1               | 2.95           | 3.586(5)               | 123                      | $x, y, z+1$                    |
| <b>L<sup>2</sup>–Br</b> | C3–H3... <i>Cg</i> 5                  | 2.58           | 3.464(6)               | 154                      | $2-x, 1-y, -z$                 |
|                         | C13–H13... <i>Cg</i> 1                | 2.98           | 3.908(7)               | 167                      | $x, y-1, z$                    |

<sup>a</sup> Definition of the ring centroids:*Cg*1 – metalloaromatic chelate ring Cu1/O2/C8/C7/N2;*Cg*5 – phenyl ring C10A–C15A;*Cg*5A – phenyl ring of **L<sup>2</sup>–Cl** in the major disordered conformation C10A–C15A;*Cg*5B – phenyl ring of **L<sup>2</sup>–Cl** in the minor disordered conformation C10B–C15B.

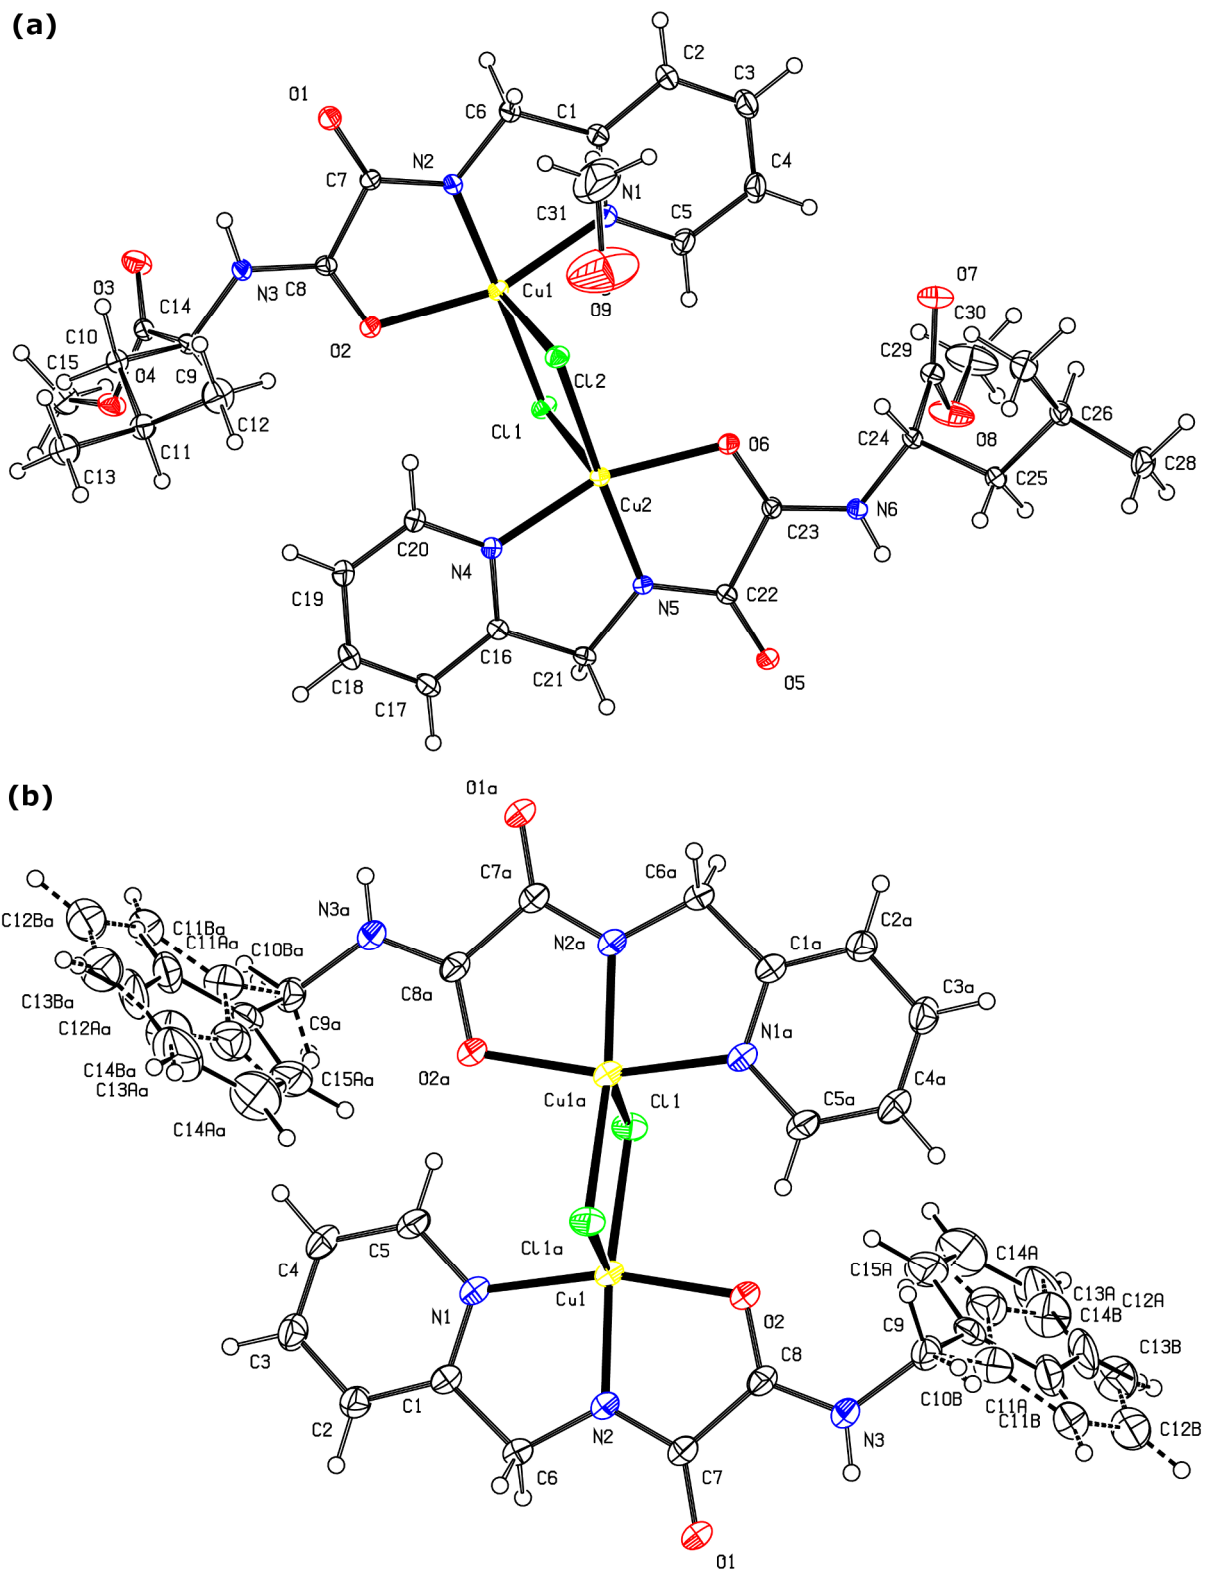

**Fig. S7:** Atom numbering schemes for (a)  $L^1\text{-Cl}$  and (b)  $L^2\text{-Cl}$ . Dashed lines represent the minor conformation of the disordered *N*-benzyl group. Atoms labelled with “a” in  $L^2\text{-Cl}$  are centrosymmetrically related to those in the other half of a molecule.



(a)

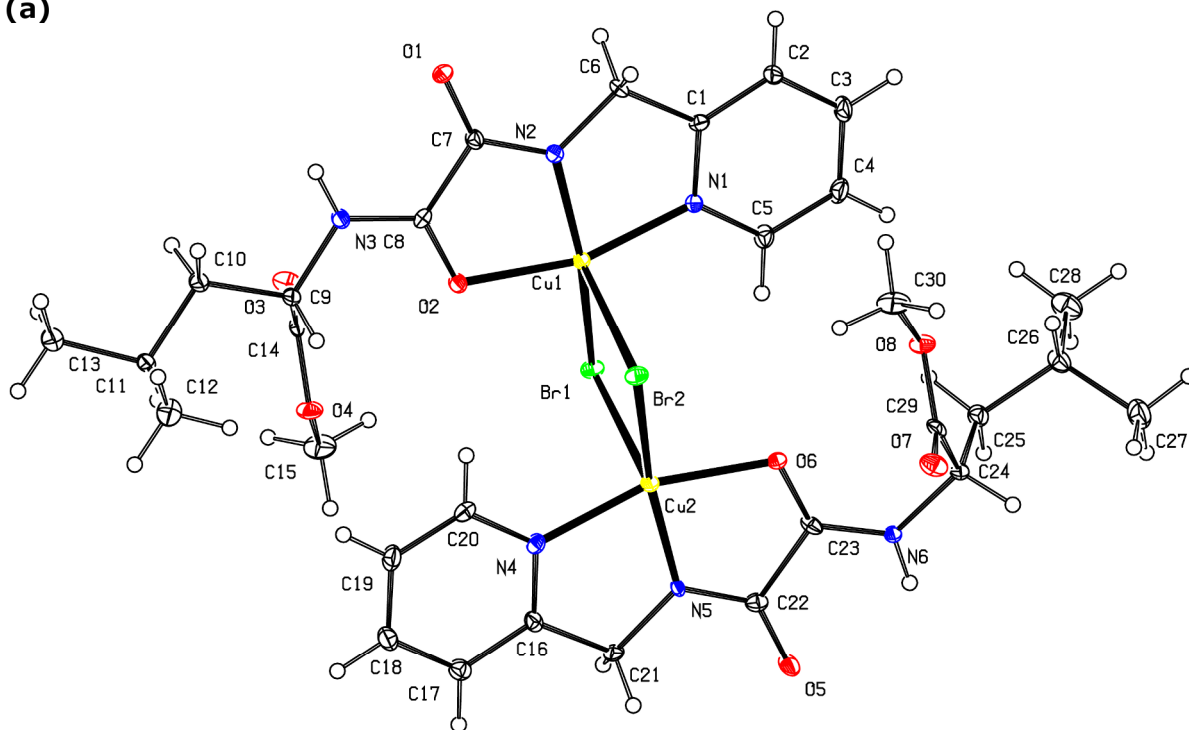

(b)

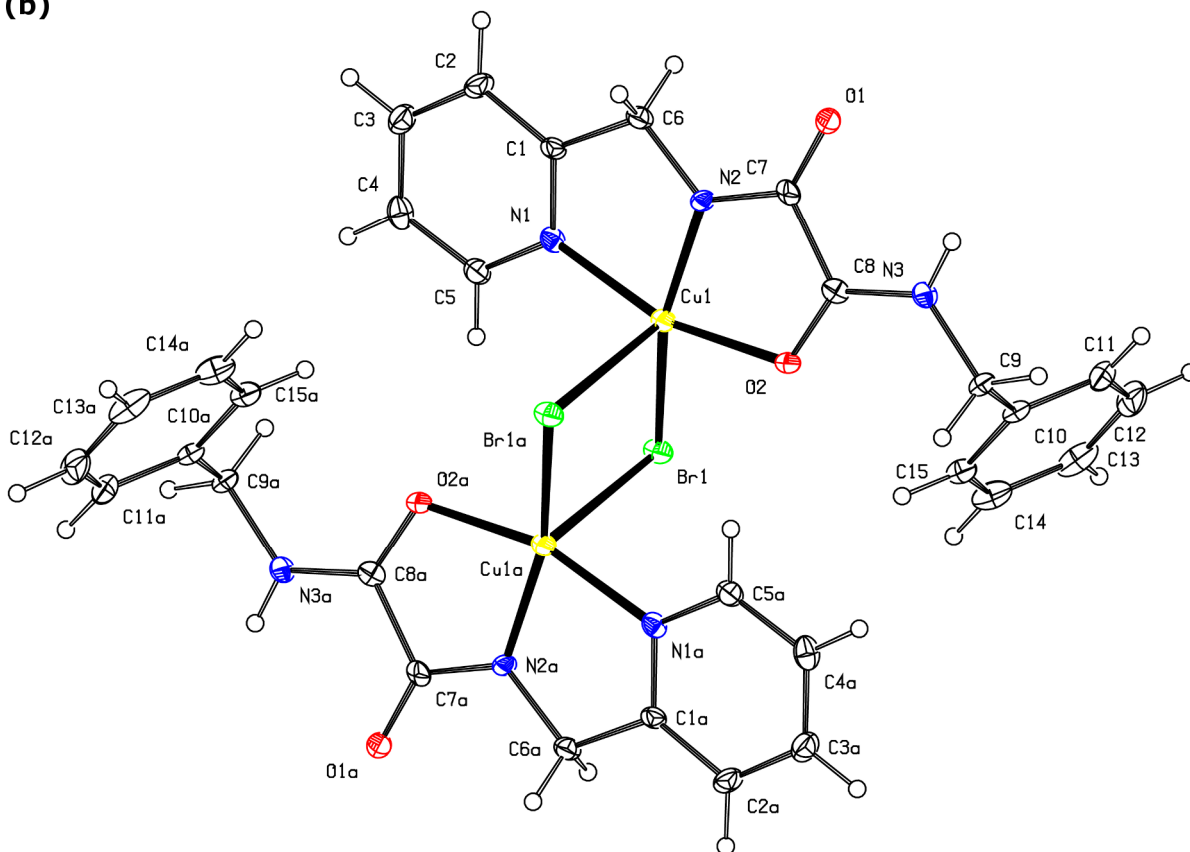

**Fig. S8:** Atom numbering schemes for (a)  $L^1$ -Br and (b)  $L^2$ -Br. Atoms labelled with "a" in  $L^2$ -Br are centrosymmetrically related to those in the other half of a molecule.

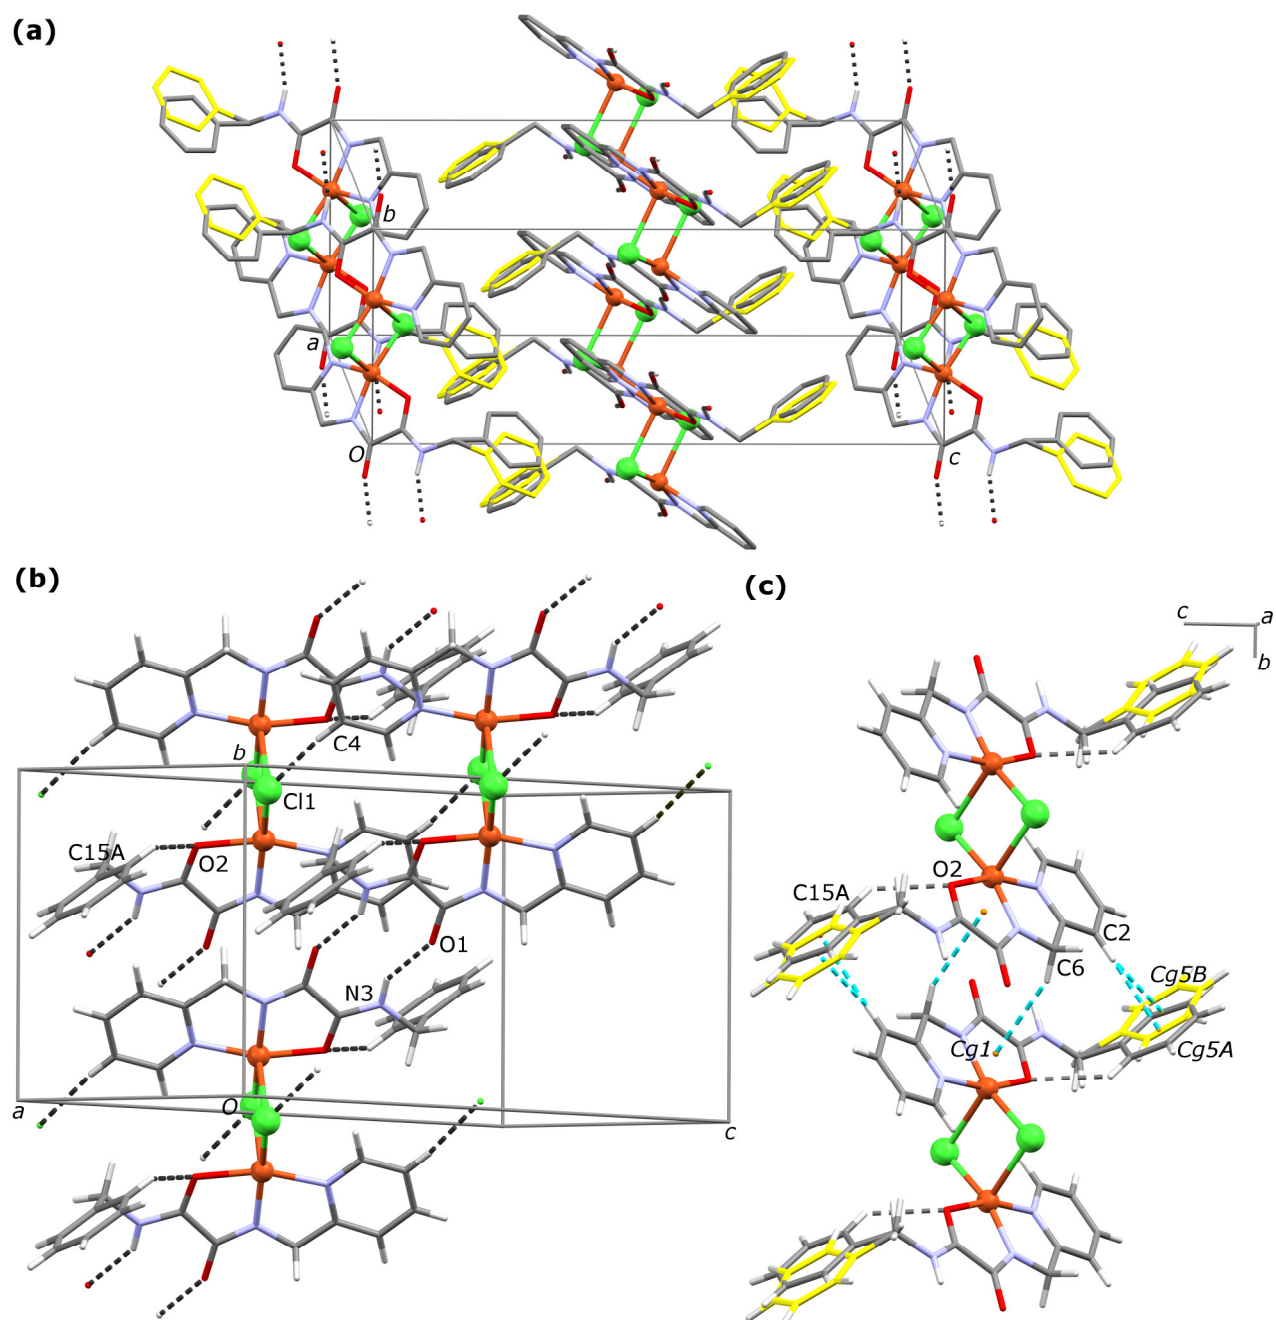

**Fig. S9:** Molecular packing in the crystal structure of  $L^2-Cl$ . (a) Supramolecular architecture allows the discrete disorder of *N*-benzyl groups. (b) In addition to the *N*-H...O hydrogen bonds, the *C*-H...O and *C*-H...Cl interactions are also present. (c) *C*-H... $\pi$  interactions play a role in the molecular association. Minor conformation of the disordered *N*-benzyl group is depicted in yellow, except in (b) where it is omitted for clarity.  $C_{gn}$  denotes a centroid of the ring *n* as defined in Table 7. Interactions are represented as dashed lines in different colours: *cyan* for *C*-H... $\pi$  interactions and *black* for other types of hydrogen bonding. H atoms bound to C atoms are omitted for clarity in (a). Cu and Cl atoms are shown as large spheres.

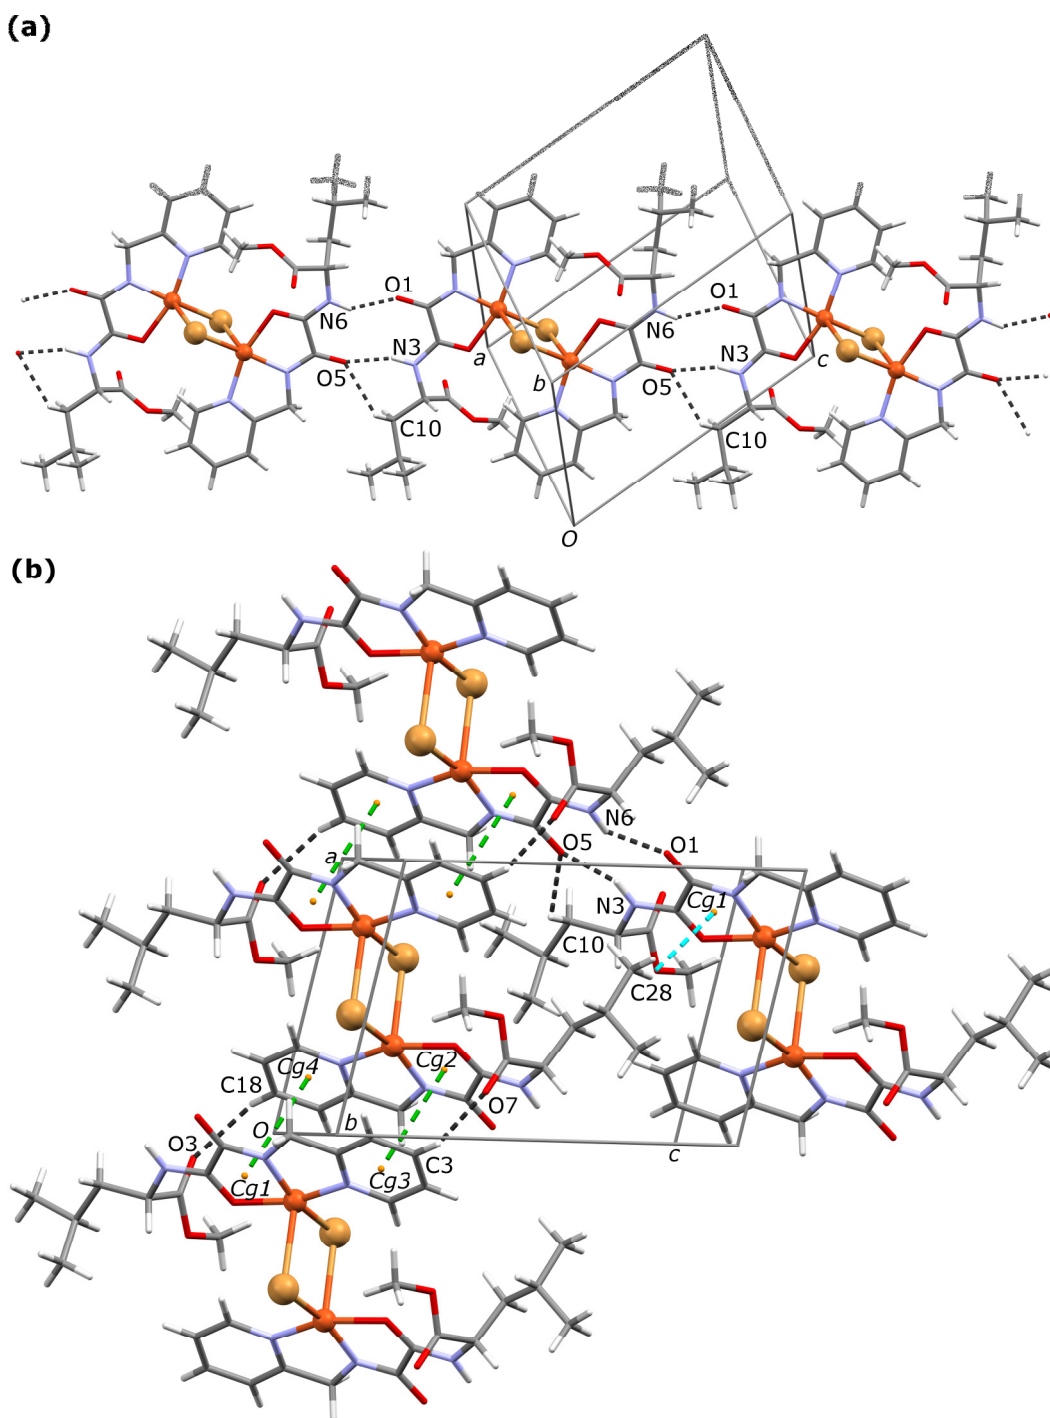

**Fig. S10:** Molecular packing in the crystal structure of **L<sup>1</sup>-Br**. (a) An infinite chain of N–H···O hydrogen-bonded molecular dimers. (b) Stacking, C–H··· $\pi$  and C–H···O interactions. *C<sub>gn</sub>* denotes a centroid of the ring *n* as defined in Table 6. Interactions are represented as dashed lines in different colours: *green* for the stacking interactions, *cyan* for a C–H··· $\pi$  interaction and *black* for other types of hydrogen bonding. Cu and Br atoms are shown as large spheres.

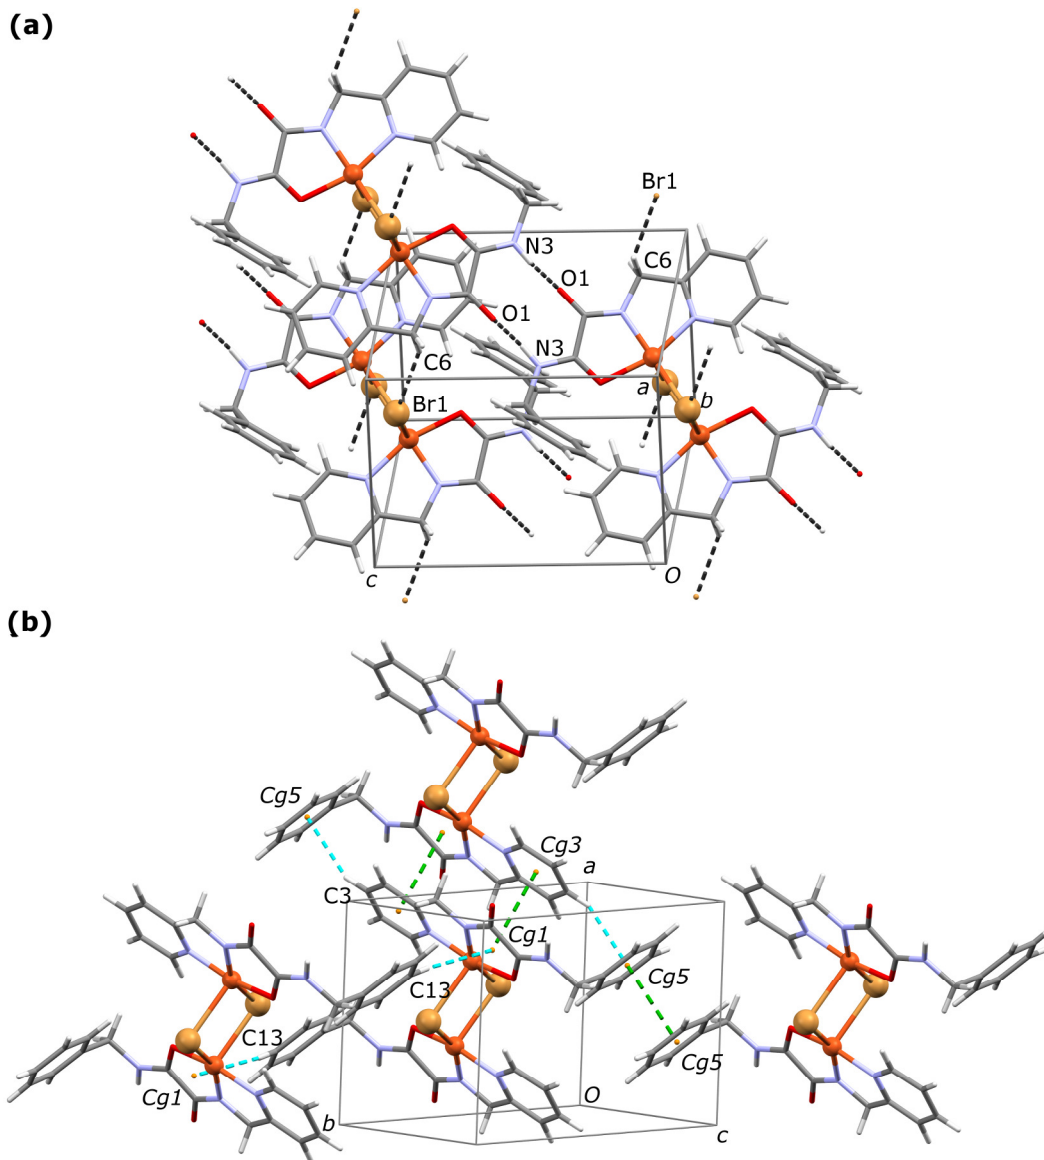

**Fig. S11:** Molecular packing in the crystal structure of  $L^2-Br$ . (a) N–H...O and C–H...Br hydrogen bonds. (b) Stacking and C–H... $\pi$  interactions.  $Cg_n$  denotes a centroid of the ring  $n$  as defined in Table 6. Interactions are represented as dashed lines in different colours: *green* for the stacking interactions, *cyan* for C–H... $\pi$  interactions and *black* for other types of hydrogen bonding. Cu and Br atoms are shown as large spheres.

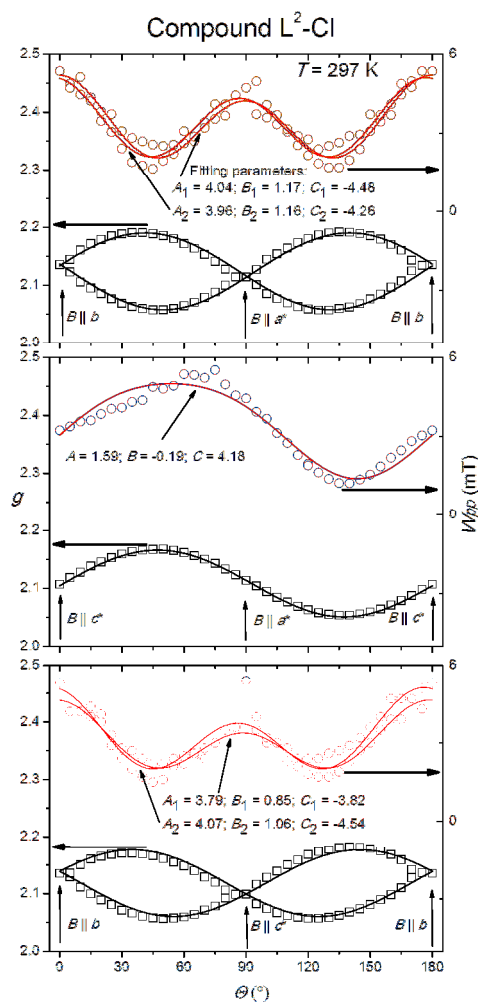

**Fig. S12:** Angular variation of the  $g$ -values (black squares) and the  $W_{pp}$  linewidths (red circles) of EPR lines for the single crystal of compound  $L^2-Cl$ , at room temperature, in three mutually perpendicular planes. Solid lines represent the fitted  $g$ -values with parameters given in Table 2 and  $W_{pp}$  linewidths with parameters given in the figure, according to eq. 1 and eq. 2, respectively.

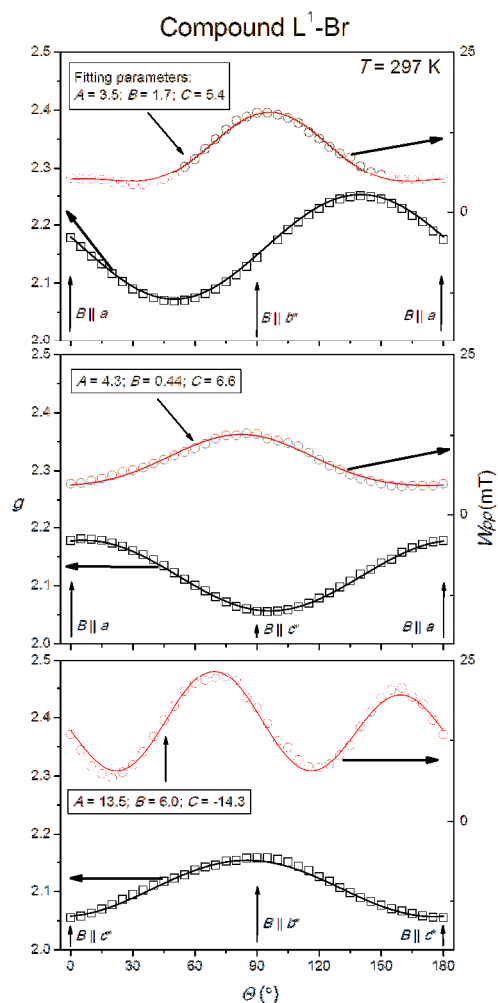

**Fig. S13:** Angular variation of the  $g$ -values (black squares) and the  $W_{pp}$  linewidths (red circles) of EPR lines for the single crystal of compound  $L^1$ -Br, at room temperature, in three mutually perpendicular planes. Solid lines represent the fitted  $g$ -values with parameters given in Table 2 and  $W_{pp}$  linewidths with parameters given in the figure, according to eq. 1 and eq. 2, respectively.

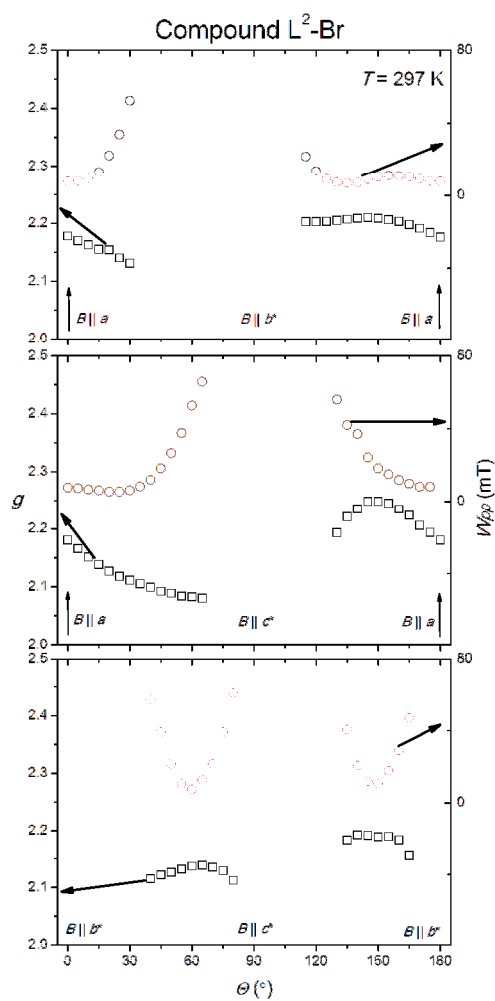

**Fig. S14:** Angular variation of the  $g$ -values (black squares) and the  $W_{pp}$  linewidths (red circles) of EPR lines for the single crystal of compound  $L^2-Br$ , at room temperature, in three mutually perpendicular planes. Some EPR lines were too weak and/or too broad to be detected.

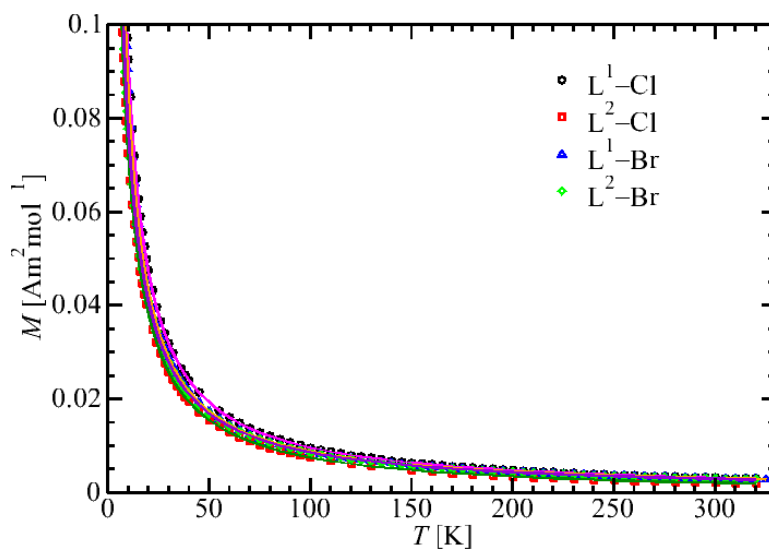

**Fig. S15:** Temperature dependence of magnetization, measured in field of 0.1 T. Lines are fitting curves using the Curie-Weiss model. We have obtained the following Curie constants (in emuK/molOe): 0.982(5), 0.829(3), 0.854(7) and 0.859(5), for complexes **L<sup>1</sup>-Cl**, **L<sup>2</sup>-Cl**, **L<sup>1</sup>-Br** and **L<sup>2</sup>-Br**, respectively. The resultant *g*-factors are 2.29(1), 2.10(1), 2.14(1) and 2.14(1) and Weiss parameters are -0.6(3)K, -1.3(7)K, -0.1(2)K, and -1.0(4)K, for **L<sup>1</sup>-Cl**, **L<sup>2</sup>-Cl**, **L<sup>1</sup>-Br** and **L<sup>2</sup>-Br**, respectively.



**Table 8** Structural and magnetic properties for the selected dibromo-bridged copper(II) dimers

| Compound <sup>a</sup>                                                                 | Geometry | $\tau$    | $2J$ (cm <sup>-1</sup> ) | Ref.      |
|---------------------------------------------------------------------------------------|----------|-----------|--------------------------|-----------|
| [Cu( $\alpha$ -pic) <sub>2</sub> Br <sub>2</sub> ] <sub>2</sub>                       | SP       | 0         | -5                       | 55        |
| [Cu(dmen)Br <sub>2</sub> ] <sub>2</sub>                                               | SP       | 0.11      | -2.4                     | 30        |
| [Cu(dmgh)Br <sub>2</sub> ] <sub>2</sub>                                               | SP       | 0.025     | -3.02                    | 56        |
| [Cu(4-metz) <sub>2</sub> Br <sub>2</sub> ] <sub>2</sub>                               | SP       | 0.045     | -2.4                     | 50        |
| [Cu(dien)Br <sub>2</sub> ] <sub>2</sub> (ClO <sub>4</sub> ) <sub>2</sub>              | SP       | 0.3       | 2.8                      | 12        |
| [Cu(4-meox) <sub>2</sub> Br <sub>2</sub> ] <sub>2</sub>                               | SP       | 0.26      | -15.2                    | 57        |
| [Cu(terpy)Br] <sub>2</sub> (PF <sub>6</sub> ) <sub>2</sub>                            | SP       | 0.24      | -7.4                     | 49        |
| [Cu(L <sup>a</sup> )Br <sub>2</sub> ] <sub>2</sub>                                    | SP       | 0.02;0.1  | -11.76                   | 10        |
| [Cu(L <sup>b</sup> )Br] <sub>2</sub>                                                  | SP       | 0.03      | -3.14                    | 58        |
| [Cu(tmen)Br <sub>2</sub> ] <sub>2</sub>                                               | SP       | 0.25      | -4                       | 54, 59    |
| <b>L<sup>1</sup>-Br</b>                                                               | SP       | 0.04;0.00 | -0.14                    | this work |
| <b>L<sup>2</sup>-Br</b>                                                               | SP       | 0.10      | -2.36                    | this work |
| [Cu(MAEP)Br <sub>2</sub> ] <sub>2</sub>                                               | TBP      | 0.52      | -4.3                     | 60        |
| (3ap) <sub>2</sub> [Cu <sub>2</sub> Br <sub>6</sub> ] <sub>2</sub> ·2H <sub>2</sub> O | TBP      | 0.6       | -53.8                    | 61        |
| [Cu(dmtp) <sub>2</sub> Br <sub>2</sub> ] <sub>2</sub> ·2H <sub>2</sub> O              | TBP      | 0.62      | -21.1                    | 54        |

<sup>a</sup> Abbreviations:  $\alpha$ -pic =  $\alpha$ -picoline (2-methylpyridine); MAEP = 2-(2-(methylamino)ethyl)pyridine; dmen = *N,N*-dimethylethylenediamine; dmgh = dimethylglyoxime; 4-metz = 4-methylthiazole; dien = diethylenetriamine; 4-meox = 4-methyloxazole; terpy = 2,2':6',2''-terpyridine; L<sup>a</sup> = 1,4-diazacycloheptane; HL<sup>b</sup> = *N*-(1H-pyrrol-2-ylmethylene)-2-pyridineethanamine; tmen = *N,N,N',N'*-tetramethylethylenediamine; 3ap = 3-aminopyridinium cation; dmtp = 5,7 dimethyl-1,2,4-triazolo[1,5- $\alpha$ ]pyrimidine; SP = square pyramid and TBP = trigonal bipyramid.
